# Supplementary material for: Biomimetic polymeric transcatheter heart valve leaflets with low calcification and good regenerative ability
Source: Royal Society of Chemistry journal article supplement (doi:10.1039/d3tb00761h), 2023-01-01
Supplement: d3tb00761h1.pdf [file d3tb00761h1.pdf]

1 **Biomimetic polymeric transcatheter heart valve leaflets with low**  
2 **calcification and good regenerative ability**

3 Xiaoxiao Wang<sup>a,1</sup>, Honghui Jiang<sup>a,1</sup>, Wenjie Zhang<sup>d,1</sup>, Yuanyuan Kong<sup>a</sup>, Deling Kong<sup>a,c,\*</sup>, Jing Liu<sup>a,</sup>  
4 <sup>b\*\*</sup>, Zhihong Wang<sup>a\*\*\*</sup>

5

6 <sup>a</sup>*Tianjin Key Laboratory of Biomaterial Research, Institute of Biomedical Engineering, Chinese*  
7 *Academy of Medical Sciences and Peking Union Medical College, Tianjin 300192, China*

8 <sup>b</sup>*Tianjin Enterprise Key Laboratory for Application Research of Hyaluronic Acid, Tianjin 300385,*  
9 *China*

10 <sup>c</sup>*Key Laboratory of Bioactive Materials of Ministry of Education, State Key Laboratory of Medicinal*  
11 *Chemical Biology, College of Life Science, Nankai University, Tianjin 300071, China*

12 <sup>d</sup>*Tianjin Center for Medical Device Evaluation and Inspection*

13 \*Corresponding authors at: College of Life Science, Nankai University, Tianjin 300071, China.

14 \*\*Correspondence author at: Institute of Biomedical Engineering, Chinese Academy of Medical  
15 Sciences and Peking Union Medical College, 236 Baidi Road, Nankai district, Tianjin 300192,  
16 China.

17 \*\*\*Correspondence author at: Institute of Biomedical Engineering, Chinese Academy of Medical  
18 Sciences and Peking Union Medical College, 236 Baidi Road, Nankai district, Tianjin 300192,  
19 China.

20 *E-mail addresses:* wangzhihong@bme.pumc.edu.cn (Z. Wang), liujing@bme.pumc.edu.cn(J. Liu),  
21 kongdeling@nankai.edu.cn(D. Kong)

22 <sup>1</sup> These authors contributed equally to this work.

23

24

25

26

27

28

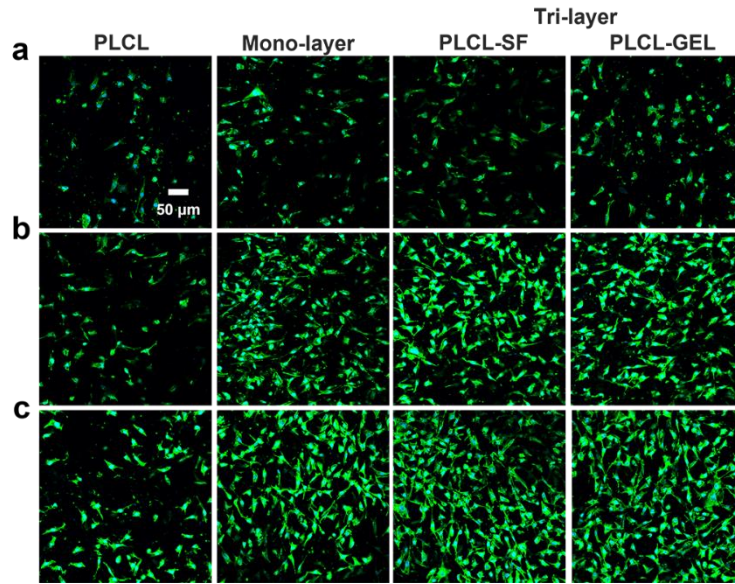

30

31 **Fig. S1.** Cell adhesion of HUVECs on PLCL, mono-layer and the biomimetic tri-layer valves. (a-c)

32 CLSM images of actin/nuclei staining of adhered HUVECs (green: cytoskeleton; blue: nuclei) after (a)

33 1, (b) 3 and (c) 5 days of culture. Scale bars: 50 μm.

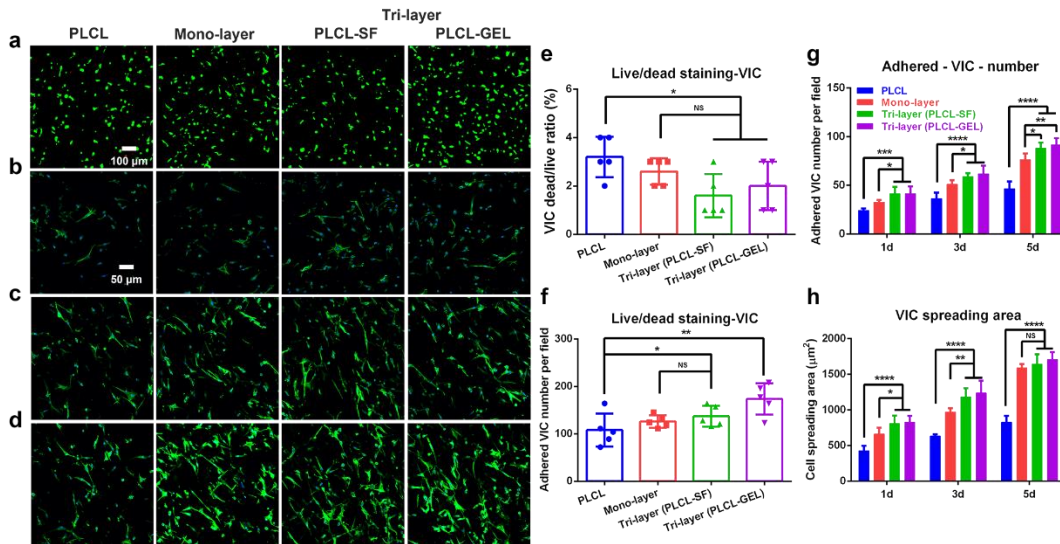

34

35 **Fig. S2.** Live/Dead staining and cell adhesion of VICs on PLCL, mono-layer and the biomimetic tri-layer

36 valves. (a) CLSM images of VICs (green: live cells; red: dead cells) at 24 hours. Scale bars: 100 μm. (b-

37 d) CLSM images of actin/nuclei staining of adhered VICs (green: cytoskeleton; blue: nuclei) at (b) day

38 1, (c) day 3 and (d) day 5. Scale bars: 50 μm. (e-f) Quantitative analysis of live/dead assay. (g) Adhered

39 VICs' number and (h) spreading area calculated from actin/nuclei staining.

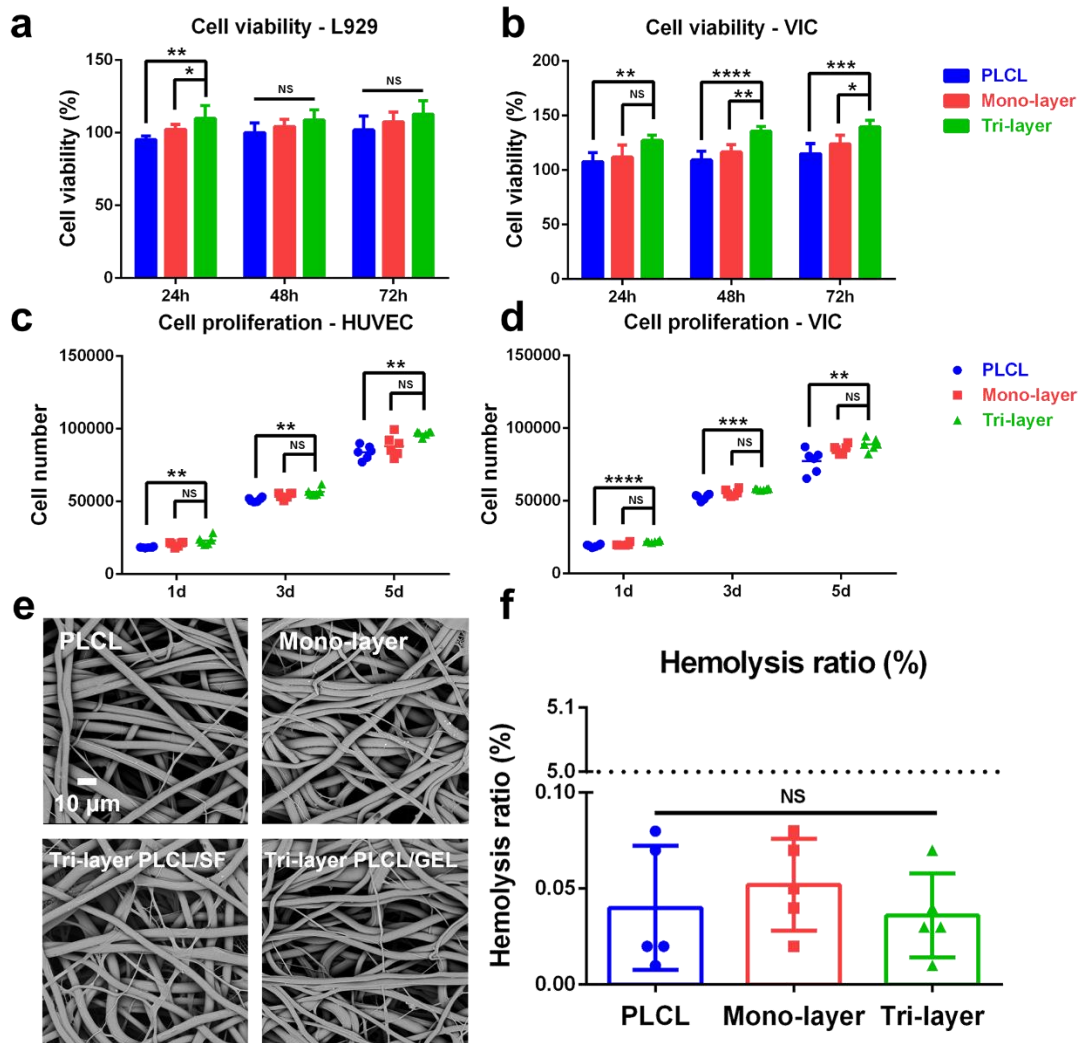

40  
 41 **Fig. S3.** Cell viability and proliferation grown on PLCL, mono-layer valve and the biomimetic tri-layer  
 42 valve. The cell viability of (a) L929 and (b) VICs. The cell proliferation of (c) HUVECs and (d) VICs.  
 43 (e-f) Blood compatibility test. (e) Platelet adhesion test and (f) Hemolysis ratio of PLCL, mono-layer  
 44 valve and the biomimetic tri-layer valve. Tri-layer group was observed from both PLCL/SF and  
 45 PLCL/GEL side. Scale bars: 10 μm.

46  
 47

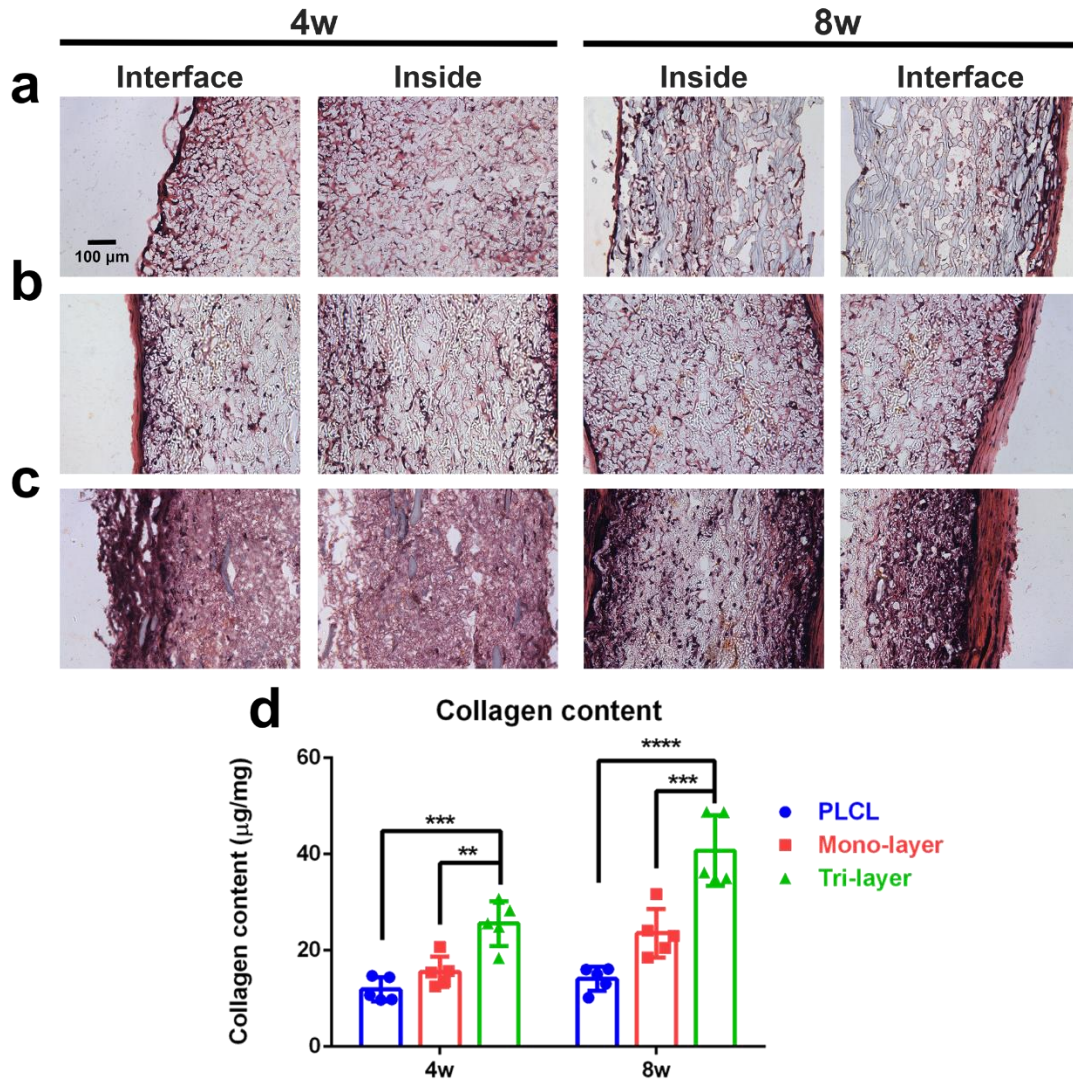

48

49 **Fig. S4.** Collagen stained by Masson's Trichrome of (a) PLCL, (b) mono-layer, and (c) the biomimetic

50 tri-layer valves after subcutaneous implantation for 8 weeks. Scale bars: 100  $\mu\text{m}$ . (d) Quantitative content

51 of collagen.

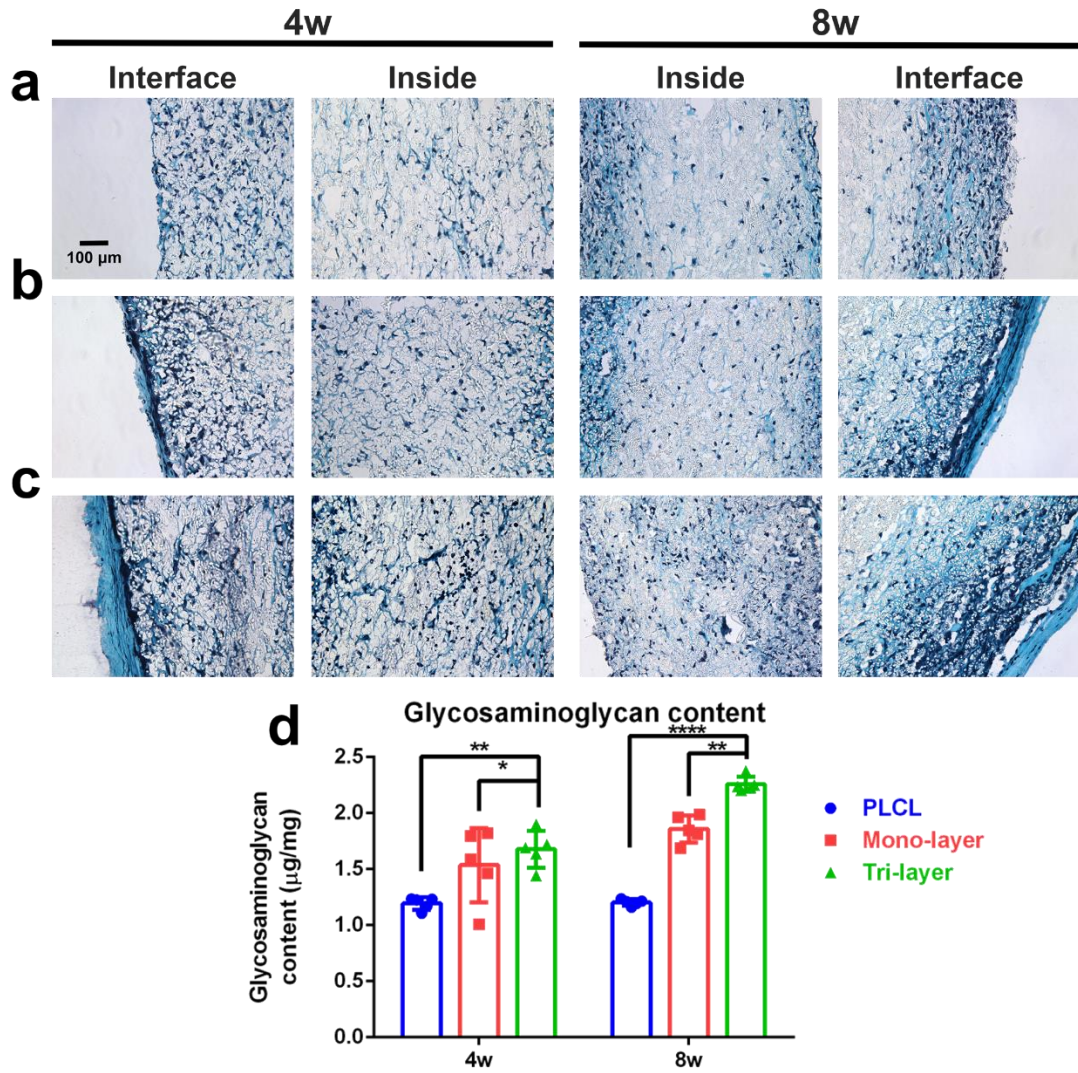

52

53 **Fig. S5.** Glycosaminoglycan stained by Safranin O Solid Green of (a) PLCL, (b) mono-layer, and (c) the

54 biomimetic tri-layer valves after subcutaneous implantation for 8 weeks. Scale bars: 100  $\mu\text{m}$ . (d)

55 Quantitative content of glycosaminoglycan.

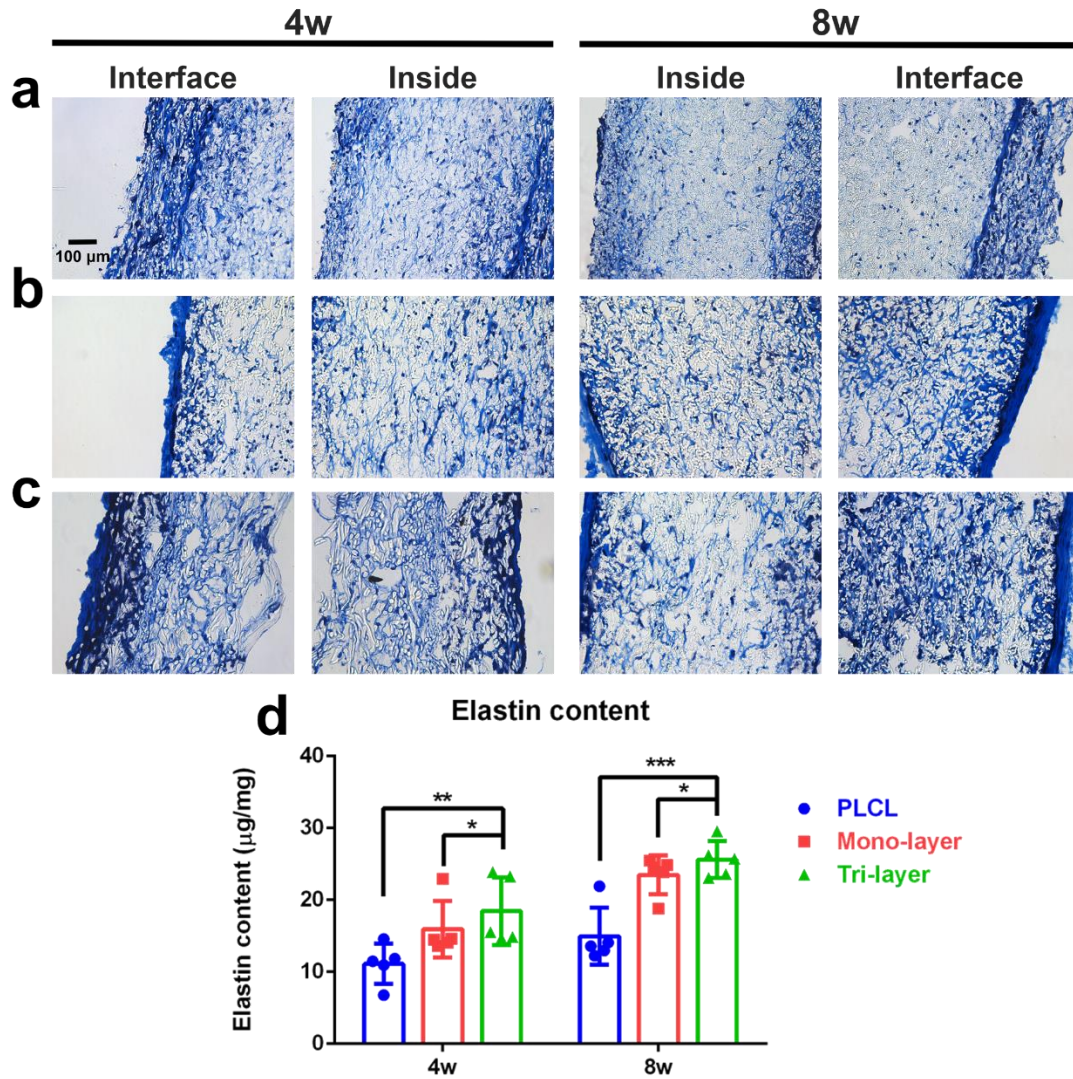

56

57 **Fig. S6.** Elastin stained by Verhoeff-Van Gieson of (a) PLCL, (b) mono-layer, and (c) the biomimetic tri-

58 layer valves after subcutaneous implantation for 8 weeks. Scale bars: 100 µm. (d) Quantitative content

59 of elastin.

60 **Table S1. Testing parameters for Pulsating flow test**

| Abbreviations | Cardiac output |                        | Average aortic pressure (mmHg) |
|---------------|----------------|------------------------|--------------------------------|
|               | (L/min)        | Beat rate (cycles/min) |                                |
| 5-70-100      | 5              | 70                     | 100                            |
| 5-120-80      | 5              | 120                    | 80                             |

---

|           |   |     |     |
|-----------|---|-----|-----|
| 5-120-100 | 5 | 120 | 100 |
| 5-120-120 | 5 | 120 | 120 |

---

61
